# Supplementary material for: “This Program Is Literally Saving Lives”: A Participatory Qualitative Study of Youth Outcomes in a Community-Based Music Program to Interrupt Violence
Source: Research Square preprint supplement (doi:10.21203/rs.3.rs-5889274/v1), 2025-04-03
Supplement: Supplementary file 1 [file 7f46640663dda21e164a3ec8.docx]

| **Supplementary Table 1. Themes in Student Outcomes Identified Across Stakeholder Groups** | | |
| --- | --- | --- |
| **Theme** | **Description** | **Illustrative Example(s)** |
| Access to safe, supportive, and creative community spaces | Music accessibility in neighborhoods with historic disinvestment | “But I never thought like, dang, I was going to play an instrument. And when I said, I would want my kids to learn an instrument and when I was young, I was really thinking that before I even got to Beyond the Bars, I was thinking that if I had kids, I probably want them to learn instruments. But like at this point it was kind of too late for me.” [S4]  “And you’re so brainwashed to believe that these kids hate each other and they’re mean and they’re angry and just so aggressive. And like these kids are really happy, honestly. They’re really like goofballs really and with no safe space to be a goofball. And music allows them to kind of let that down.” [I4]  “I know outlets in my field where these kids kind of just express themselves in healthy ways. They’re not perfect. And they get in trouble as well but they’re still being exposed to things that in our inner city, our schools continue to take away from them, the music, the art, the drama that all this stuff that we know are protective factors. They’re being taken away because of funding, because there’s no funding, there’s no this. And yet here comes [BTB Instructor], who is with this idea, with his group and his teachers, his team, and I’m going to get funding, I’m going to do this. He’s bringing what the school’s taking away.” [CP6] |
| Musical and technical skill development | Mastery of new music and production skills and skill application in pursuit of new artistic ventures | “I didn’t know I could be a dope artist like I am. At first, I started rapping, it was just basic…And they definitely helped me improve…they helped me with basically having that more oomph and that more enthusiasm when I make my music.” [S11]  “They learn how to navigate the software very fast. Two in particular I’m thinking of. They’re quick with it.” [I1]  “Beyond the Bars, helps them to create their own sound and to provide structure to their music...clean up their beats so there’s not as much static in the background. He teaches them the active productive elements of music...helps them to hone their skills that they already have and then for those that’s just exploring, he helps to really expose them to the core of music...how [a] song was built entirely...all of the building blocks that go into with the different vocab and everything and understanding just how music is developed in general. So that is an educated understanding [of music production].” [CP2] |
| Personal growth | Enhanced sense of self, confidence, and self-efficacy  Greater ability to express self and regulate emotions  Greater access to coping skills | “But it was like the energy, it was already there. So I’m like, you know what, that do sound good. I would like to try that. And I was always one of the quiet kids so I didn’t necessarily, really want to engage but once I saw how everybody was like, ‘Come on girl, you sound good.’ I’m like, ‘Why not? Why not?’” [S10]  “I think it’s more so using the guitar as a coping skill. Like, if I’m stressed or something…Like, I’m not saying that I’m going to become like Beyonce or something, like, I’m not trying to take a career in music, but I feel like it’s just like another tool in your box to like let off steam.”[S18]  “...What I’ve seen is a bunch of kids that came in, not quite sure who they are and leaving out feeling like they are a little bit more sure [of] themselves than they were before they came. I think that alone is worth it all to have people come in and leave feeling swole. They feel, their shoulders are a little bit wider, their back’s a little bit straighter, their smiles a little bit brighter, their eyes are a little bit lit up. You see all that. To me, that’s what it’s about.” [I2]  “[Music provides] a healthy way to, a healthy way of communicating...another way to sort of express what has happened and what is going on in their lives, how did it go. Relationships I think we’ve referred that the relationships, not just amongst themselves, their peers, but sharing information with their caregivers or loved ones. It builds on that relationship in a positive way.” [CP 6] |
| Relational and interpersonal growth | Development of social connection and community  Enhanced communication and leadership skills  Greater trust and assumption of positive intent  Strengthened familial bonds through mutual caregiver-child understanding | “Because, I mean, before being at BTB, I was a small-group person. I mean, there was only a certain amount of people who I talked to, and trusted, and stuff like that, but now being at BTB I can say... I can look at every last one of them in there and consider them as family.” [S6]  “What I’ve learned about social life is that, I really have a lot of potential and I feel like one of the things that I learned is that you can have all the talent in the world and have all the potential in the world, but it’s like, you can’t just let it just sit there. You got to show people who you really are. You can’t just sit around, just be the best thing potentially that you could possibly be. But yeah, nobody knows. Everybody just seems like... Not like that. But a regular person. Everybody isn’t really a regular person. Everybody has their own gifts, their owns talents, their own uniqueness and their own way. But, people struggle to show it. I mean, and I do too to a certain extent, but I would say I’m more comfortable now just sharing what I had to offer.” [S9]  “Maybe communication as well. One of them in particular, early on it was hard to really communicate with him because he wasn't trying to talk or he seemed nervous. But now it's like, I see it's easier for him to explain himself. He's getting the lingo and everything. So it's like, yeah, he's definitely improved as far as communication.” [I1]  “And then you got some parents that might get a little to annoyed that their youth are trying to be rappers and things like that, but this offers a productive and disciplined way to hone their musical skills. So now it’s not just random raps or something. ‘No, mom, I’m an engineer. I can do this.’ So it is just helping to strengthen those skills and actually strengthen bonds with families, and then even when [BTB Instructor] brings a Mac computer into a household that has never seen a Mac computer in their household, then that kind of strengthens the family. I’m like, ‘Oh, this is serious.’ Or, ‘Oh, we were able to get this through this program.’” [CP2] |
| Growth mindset and future orientation | Greater discipline, persistence, and growth-mindedness  Greater awareness of and changes to future trajectory | “The most important thing I learned was patience. That was a major thing that I actually learned…In the beginning, I thought that producing was going to be fast. I was going to learn it off the top of my head, but it really took a long time to try to master this.” [S5]  “It actually helped me realize that the time period that I was like living in, I don’t know how to explain it. Like it’s not forever. It actually helped me. I feel like what I’m trying to say is that it helped me understand that I’m getting older and things are going to change and stuff, and I need to be prepared for it. Especially when it came to schooling. I feel like those conversations helped me understand that I won’t be a kid forever, at least back then.” [S7]  “Some of them started a band. Some of them have completed albums. Some of them are now student teachers with us. Some of them have used what they learned in the program to apply to their schoolwork and thrive academically. Some of them were able to use the backing of Beyond the Bars to influence judicial decisions, meaning their work in our program prevented them from having to go to prison. This program is literally saving lives….if someone stays with this program for a year or more, the likelihood of them changing the direction or trajectory of their lives is very, very reasonable to believe that the program played a part in that.” [I2]  “So just learning how to build beats and everything like that, learning how to stay on your craft, learning how to keep mixing and keep perfecting a song…So just learning how to stay on top of something and stay with something without giving up on it that teaches them great discipline, being patient with it, understand that it’s a process that helps as well, and it’s like a lot of times, we see people just go in and just think oh, they can sing a quick line, put it to a beat and then boom, I got a song. It’s much more than that... If you’re at work, even if you got a degree in this program, you still got to come into that environment and learn that system. So you can’t just say, “Oh, here’s a report, I’m good.” No, you have to learn to see what details they’re looking for, how to perfect it and if there’s another skill you can use to make your job more efficient, you incorporate that the same way if there’s another tool or resource you can use to cultivate or structure your music, you got to incorporate that. So it builds on the same values and skills that you would need to place in every other environment.” [CP2] |
