# Supplementary figures and images for: “This Program Is Literally Saving Lives”: A Participatory Qualitative Study of Youth Outcomes in a Community-Based Music Program to Interrupt Violence
Source: Research Square preprint supplement (doi:10.21203/rs.3.rs-5889274/v1), 2025-04-03

Supplemental Figure 1. Beyond the Bars Logic Model

# Beyond the Bars Logic Model

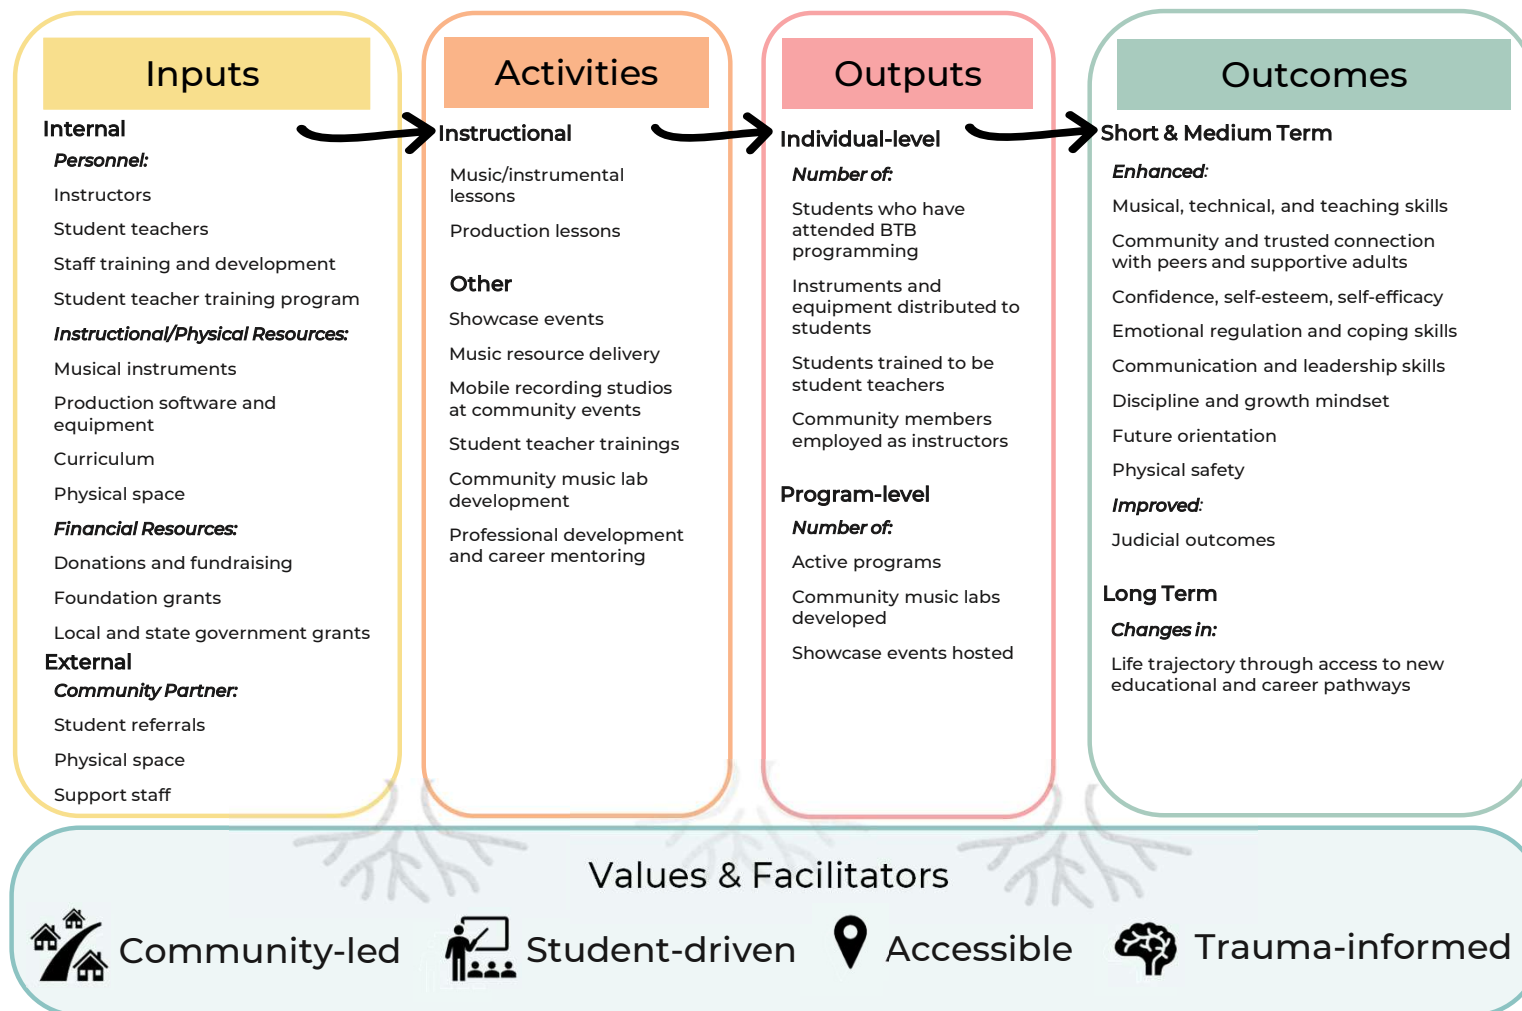

Supplement: Supplementary file 1 [file c8f4105c615e1a76de8388fc.pdf]
